# Supplementary material for: No Evidence for GADL1 Variation as a Bipolar Disorder Susceptibility Factor in a Caucasian Lithium-Responsive Cohort
Source: Atypon-hosted journal article supplement (doi:10.1176/appi.ajp.2014.14070855), 2015-01-01

**Supplemental Figure: WES Sequencing coverage.** A single affected individual in this family carries the IVS8+48delG mutation. An additional 32 controls also carry it out of 456 exomes.

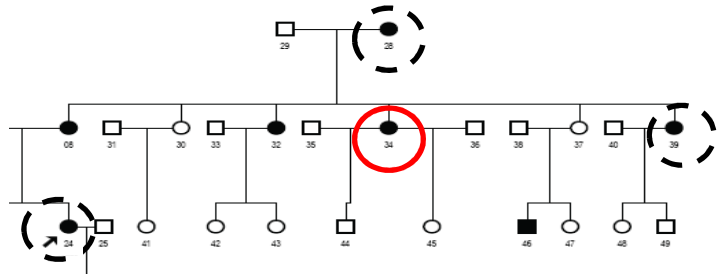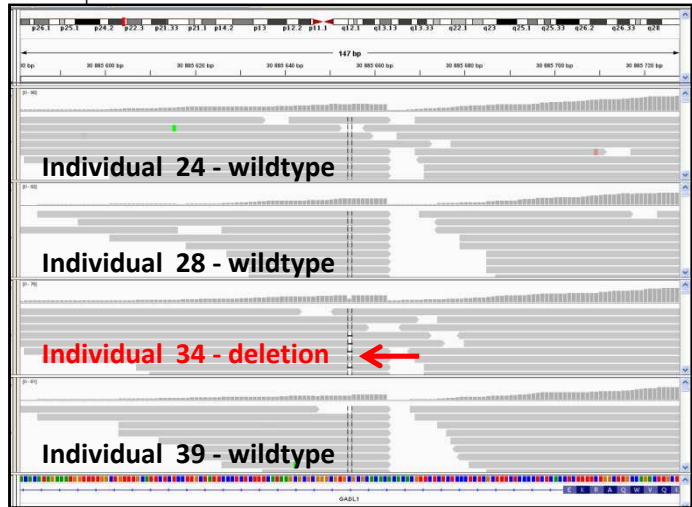

Supplement: appi.ajp.2014.14070855.ds001.pdf [file appi.ajp.2014.14070855.ds001.pdf]
